# Supplementary material for: Ionic liquid electrodeposition of 3D germanium–acetylene black–Ni foam nanocomposite electrodes for lithium-ion batteries
Source: Royal Society of Chemistry journal article supplement (doi:10.1039/c4ra10931g), 2014-01-01
Supplement: c4ra10931g1.pdf [file c4ra10931g1.pdf]

## Supporting information for Ionic liquid electrodeposition of 3D germanium–acetylene black–Ni foam nanocomposite electrodes for lithium-ion batteries

Jian Hao <sup>a,b</sup>, Xiaoxu Liu<sup>a</sup>, Na Li<sup>a</sup>, Xusong Liu<sup>a</sup>, Xiaoxuan Ma<sup>a</sup>, Yi Zhang<sup>c</sup>, Yao Li<sup>c\*</sup>, Jiupeng Zhao <sup>a,b\*</sup>

<sup>a</sup> School of Chemical Engineering and Technology, Harbin Institute of Technology, 150001, Harbin, China Fax: 086 45186402345; Tel: 086 451 86402345; E-mail: jiupengzhao@126.com.

<sup>b</sup> State Key Laboratory of Advanced Welding and Joining, Harbin Institute of Technology, Harbin 150001, China.

<sup>c</sup> Center for Composite Material, Harbin Institute of Technology, Harbin, China. Fax: 086 45186402345; Tel: 086 451 86402345; E-mail: liyao@hit.edu.cn.

*\*To whom correspondence should be addressed. E-mail: jiupengzhao@126.com.*

### *Materials Characterization.*

The 3D Ge–acetyleneblack–Ni foam nanocomposite were characterized by scanning electron microscopy (SEM), energy-dispersive X-rayspectroscopy (EDS), powder X-ray diffraction (XRD) and nitrogen BET surface area. SEM was performed on a Hitachi S-4800 scanning electron microscope operating at 20 kV. XRD analysis of the composite was done by XRD using monochromatic Cu Ka radiation with a D8 Bruker diffractometer. X-ray scan is with an increment of 0.01° with time per step and the incident angle is 0.5°. Nitrogen adsorption surface area measurements were performed after drying of single samples (150 °C, 3 h) using a 3H-2000PS1 (Beishide Instrument Technology). The apparent nitrogen surface area was calculated using the BET equation for a pressure range  $p/p^0 = 0.04-0.32$ .

## Figures

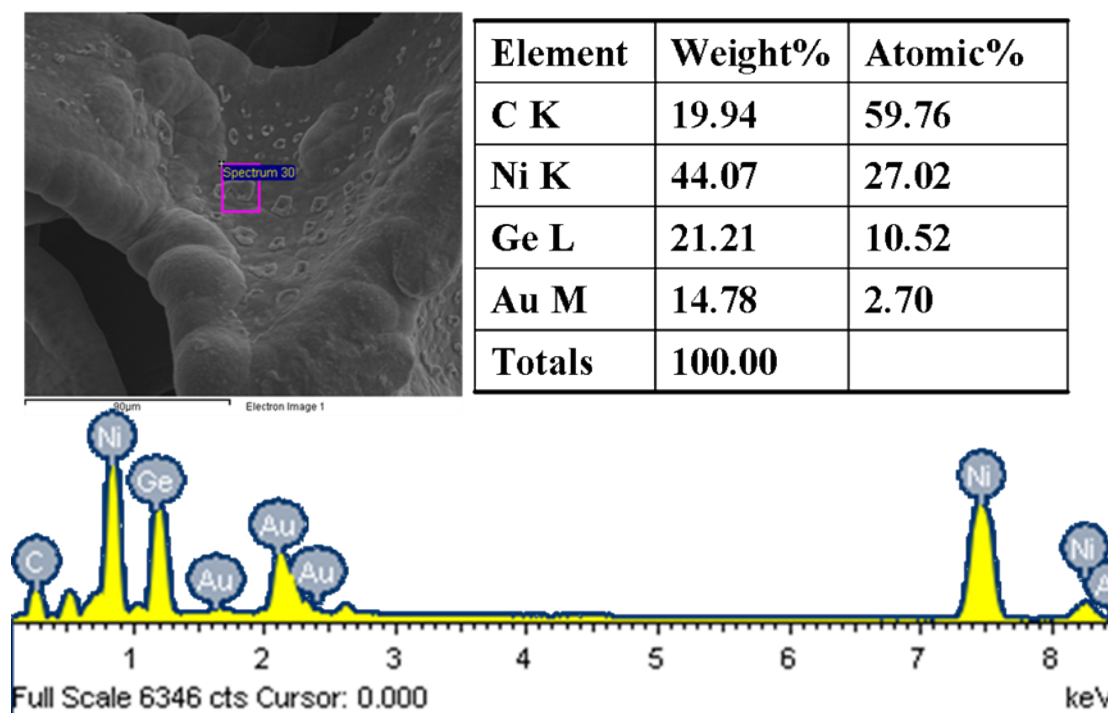

Fig.S1. EDS Spectrum of the 3D germanium–acetylene-black–Ni foam nanocomposite anode.

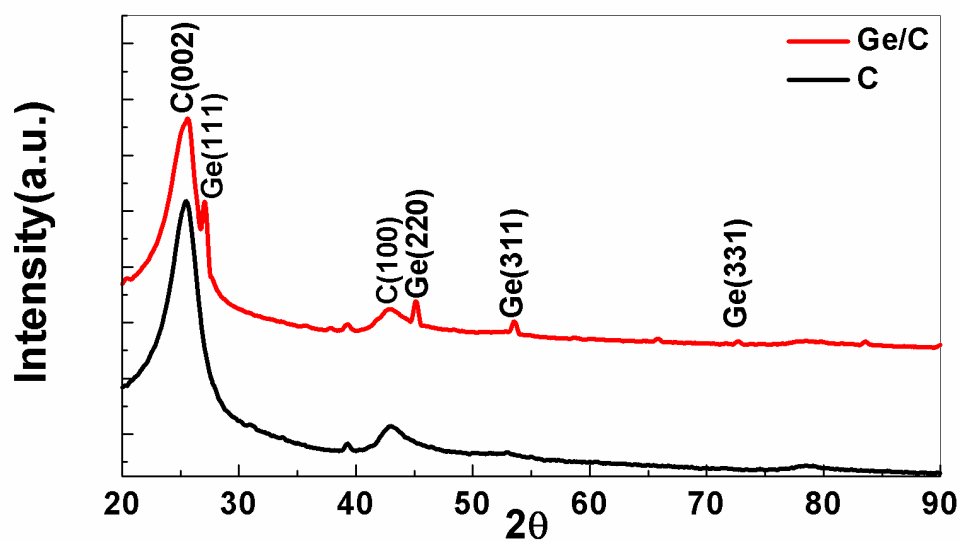

Fig. S2. The XRD patterns of Ge on acetylene-black substrate by ionic liquid electrodeposition.

Tab.S1. BET surface area

| sample | $S_{\text{BET}}$ ( $\text{m}^2/\text{g}$ ) |
|--------|--------------------------------------------|
| C      | 93.8674                                    |
| Ge/C   | 82.7768                                    |

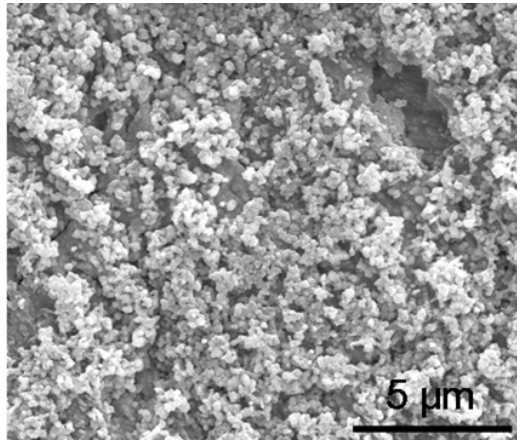

Fig.S3. SEM images of the 3D germanium-acetylene-black-Ni foam nanocomposite anode after 100 cycles at a rate of 0.1 C.
